# Supplementary material for: TExCNN: Leveraging Pre-Trained Models to Predict Gene Expression from Genomic Sequences
Source: MDPI journal article supplement (doi:10.3390/genes15121593), 2024-12-12

## Supplementary Figure S1

Nucleotide sequence representations using the pre-trained models. The representation strategies for the (a) DNABERT and (b) DNABERT-2 are illustrated, respectively.

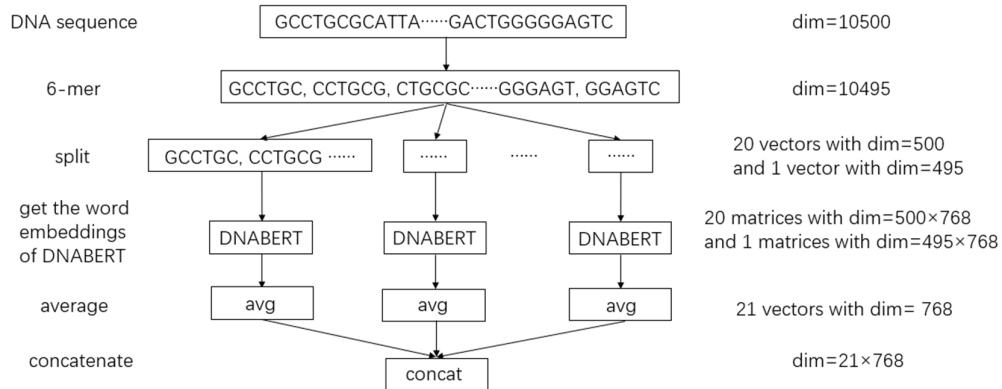

(a)

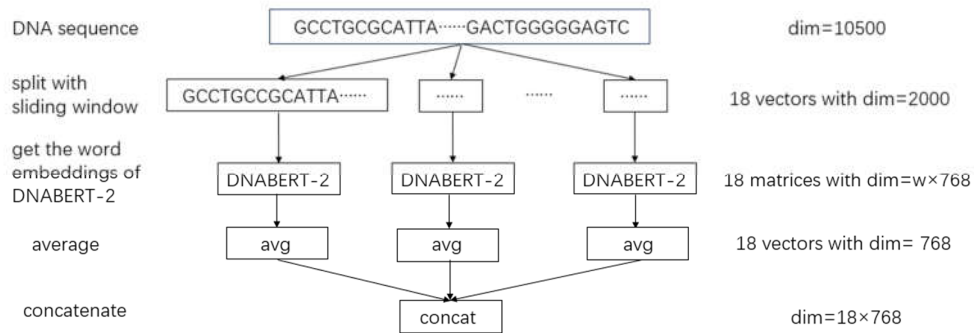

(b)

## Supplementary Figure S2

Architectures of the TExCNN models with 10500-bp input length. The TExCNN models are trained using (a) both pre-trained models and (b) only one pre-trained model.

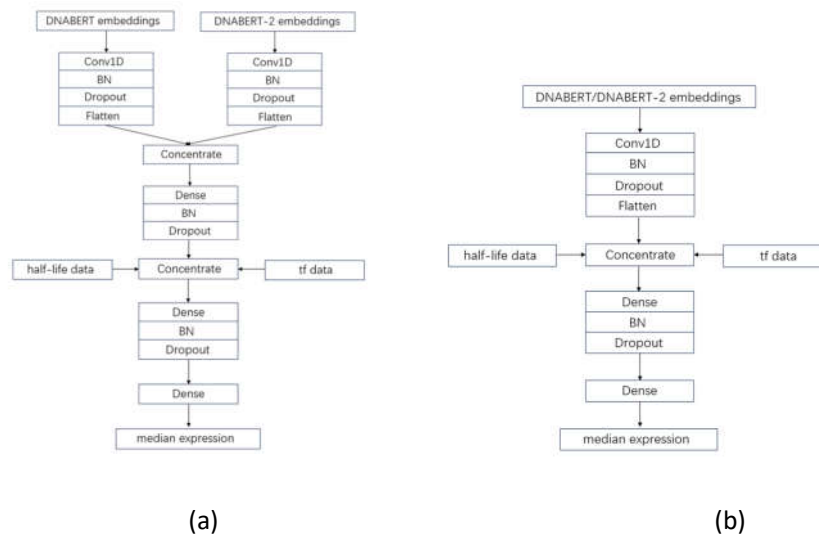

## Supplementary Figure S3

The structure of the TExCNN model with 50000-bp input length.

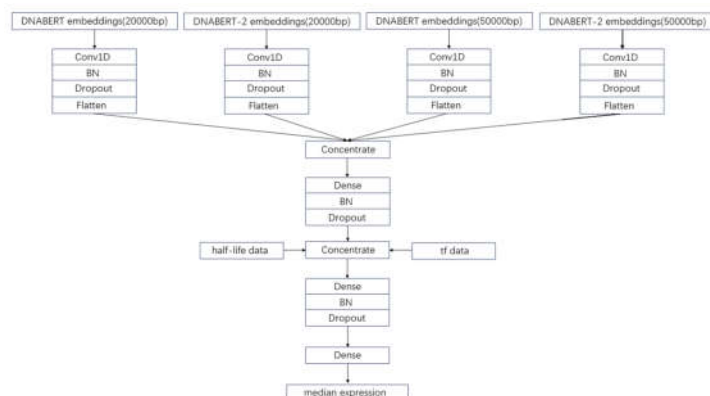

## Supplementary Figure S4

The structure of the LSTM model in Appendix D.

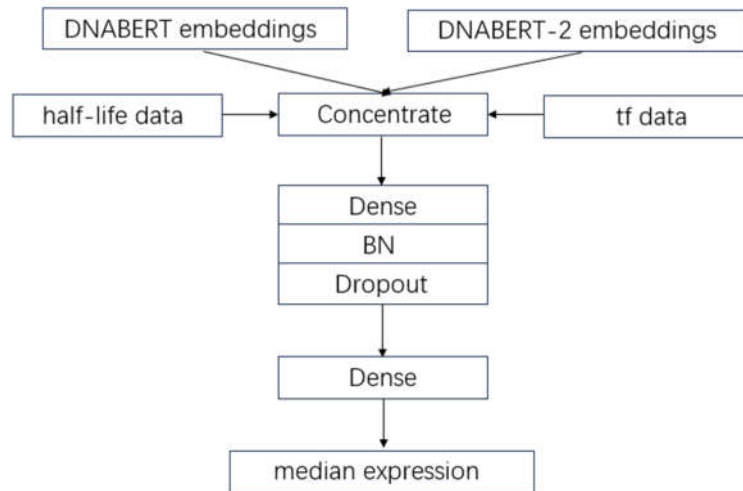

Supplement: s1 [file genes-3342798-supplementary.pdf › genes-3342798-supplementary.pdf]
